# Supplementary material
Source: PubMed Central journal article supplement (PMC6890495)
Supplement: NIHMS1059983-supplement-SI.pdf [file NIHMS1059983-supplement-SI.pdf]

## SUPPORTING INFORMATION

### Hydrolyzable tannins are iron chelators that inhibit DNA repair enzyme ALKBH2

Fangyi Chen<sup>†,‡</sup>, Qi Tang<sup>†,‡</sup>, Hang Ma<sup>†,‡</sup>, Ke Bian<sup>†</sup>, Navindra P. Seeram<sup>†</sup>, and Deyu Li<sup>†,\*</sup>

<sup>†</sup>Department of Biomedical and Pharmaceutical Sciences, College of Pharmacy, University of Rhode Island, Kingston, Rhode Island 02881, United States

<sup>‡</sup>These authors contributed equally.

#### Corresponding Author

\*E-mail: [deyuli@uri.edu](mailto:deyuli@uri.edu)

#### TABLE OF CONTENTS

**Figure S1.** Data for determining the IC<sub>50</sub> value of compound **1** (rhein) on m3C.

**Figure S2.** Data for determining the IC<sub>50</sub> value of compound **2** (gallic acid) on m3C.

**Figure S3.** Data for determining the IC<sub>50</sub> value of compound **3** (ellagic acid) on m3C.

**Figure S4.** Data for determining the IC<sub>50</sub> value of compound **4** (ginnalin acid) on m3C.

**Figure S5.** Data for determining the IC<sub>50</sub> value of compound **5** (pentagalloyl glucose) on m3C.

**Figure S6.** Data for determining the IC<sub>50</sub> value of compound **6** (punicalagin) on m3C.

**Figure S7.** Data for determining the IC<sub>50</sub> value of compound **7** (tannic acid) on m3C.

**Figure S8.** Data for determining the IC<sub>50</sub> value of compound **1** (rhein) on m1A.

**Figure S9.** Data for determining the IC<sub>50</sub> value of compound **2** (gallic acid) on m1A.

**Figure S10.** Data for determining the IC<sub>50</sub> value of compound **3** (ellagic acid) on m1A.

**Figure S11.** Data for determining the IC<sub>50</sub> value of compound **4** (ginnalin acid) on m1A.

**Figure S12.** Data for determining the IC<sub>50</sub> value of compound **5** (pentagalloyl glucose) on m1A.

**Figure S13.** Data for determining the IC<sub>50</sub> value of compound **6** (punicalagin) on m1A.

**Figure S14.** Data for determining the IC<sub>50</sub> value of compound **7** (tannic acid) on m1A.

**Figure S15.** Fe (II) ion chelator test of compound **2** (gallic acid).

**Figure S16.** Fe (II) ion chelator test of compound **5** (pentagalloyl glucose).

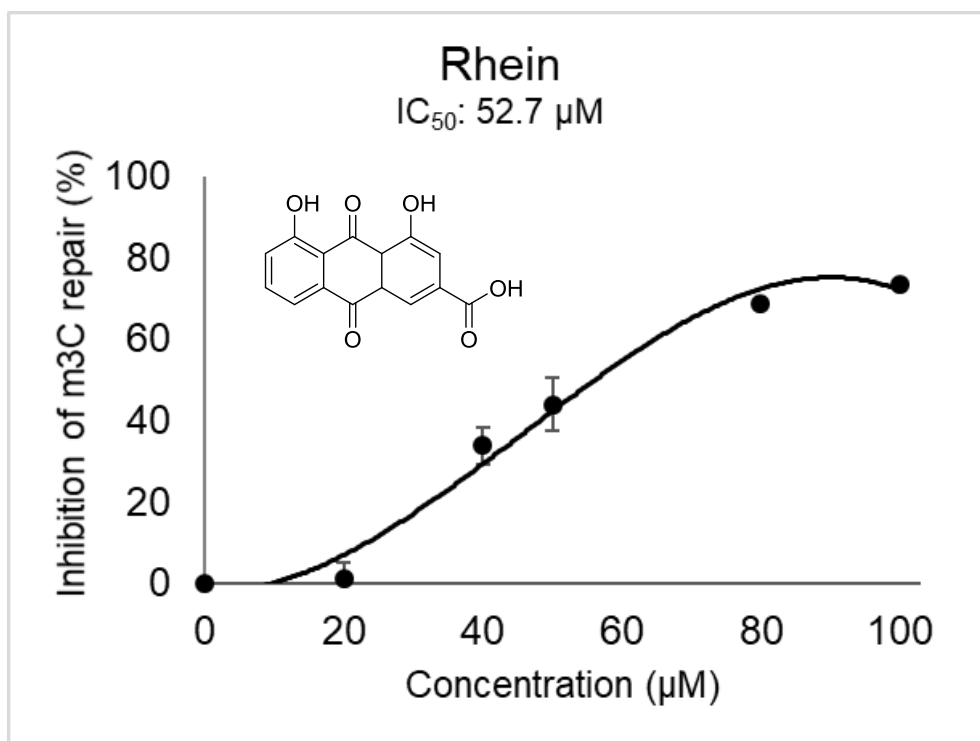

**Figure S1.** Data for determining the IC<sub>50</sub> value of compound 1 (rhein) on m3C.

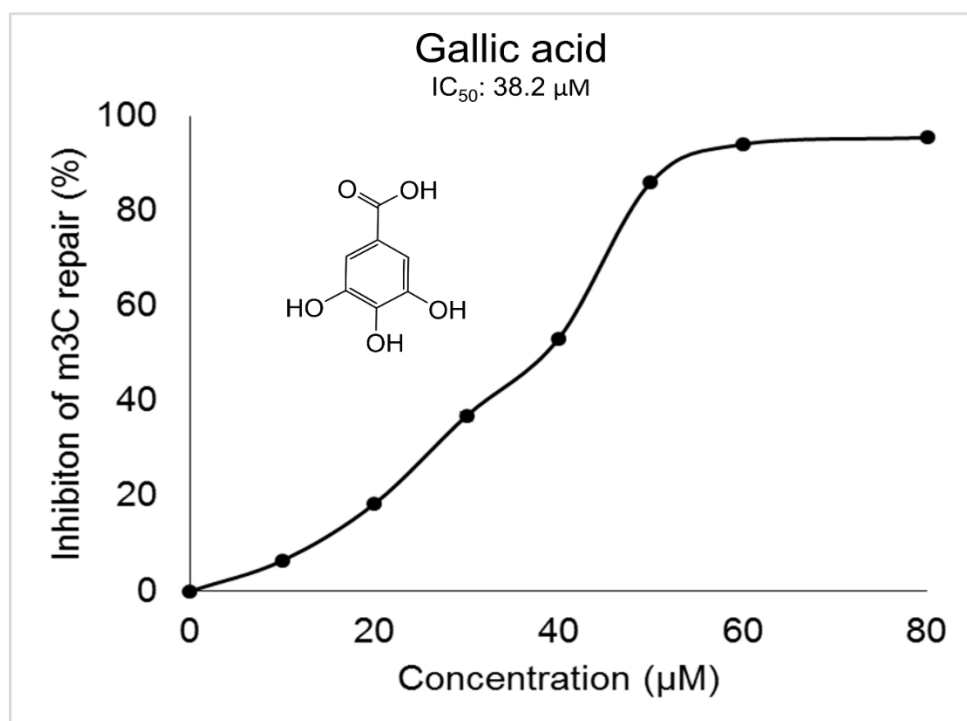

**Figure S2.** Data for determining the IC<sub>50</sub> value of compound 2 (gallic acid) on m3C.

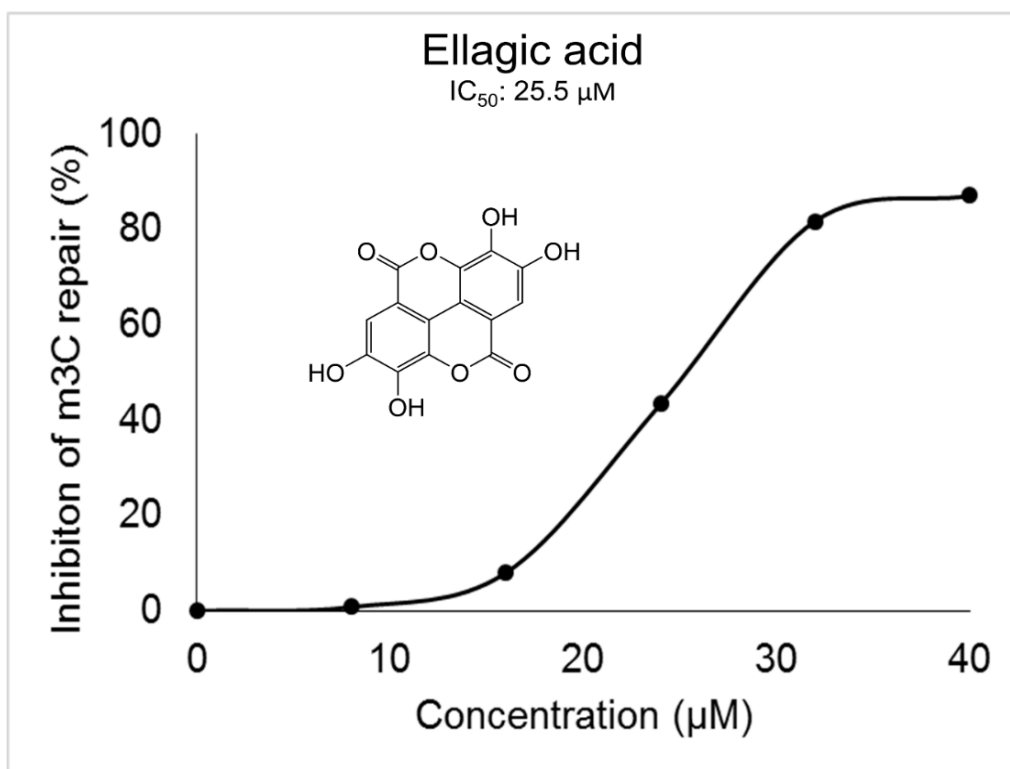

**Figure S3.** Data for determining the IC<sub>50</sub> value of compound **3** (ellagic acid) on m3C.

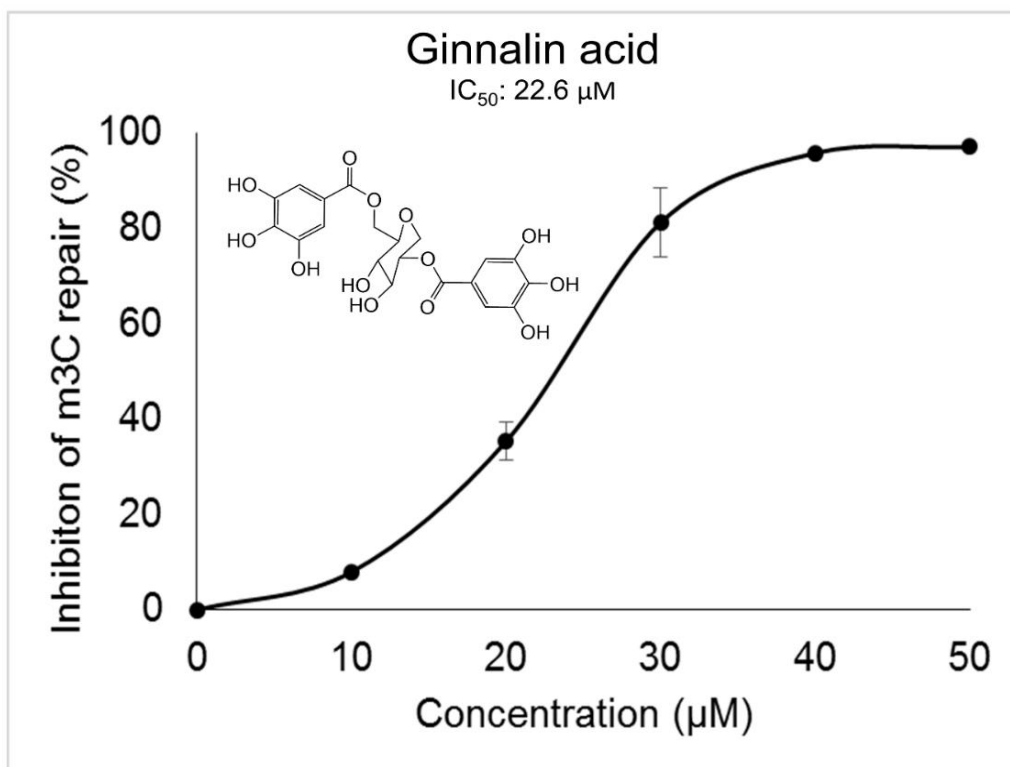

**Figure S4.** Data for determining the IC<sub>50</sub> value of compound **4** (ginnalin acid) on m3C.

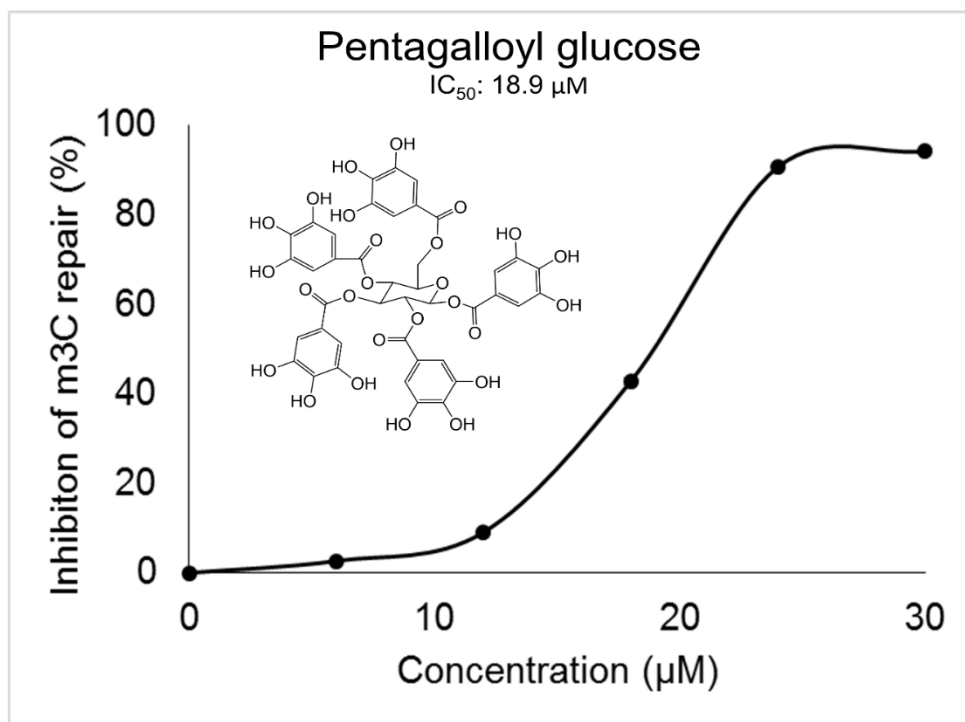

**Figure S5.** Data for determining the IC<sub>50</sub> value of compound **5** (pentagalloyl glucose) on m3C.

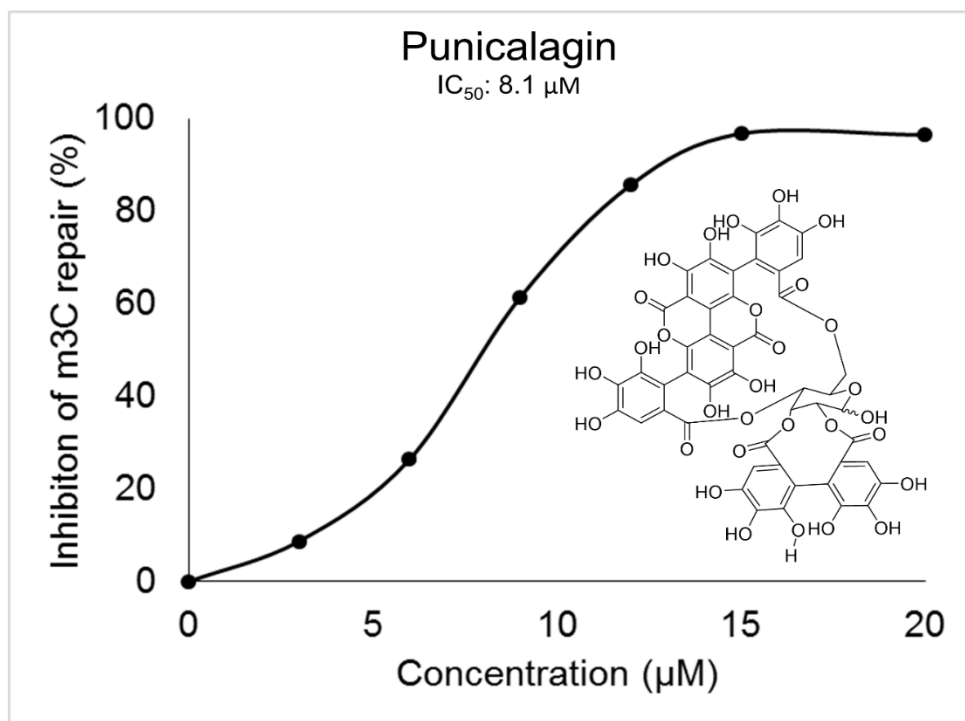

**Figure S6.** Data for determining the IC<sub>50</sub> value of compound **6** (punicalagin) on m3C.

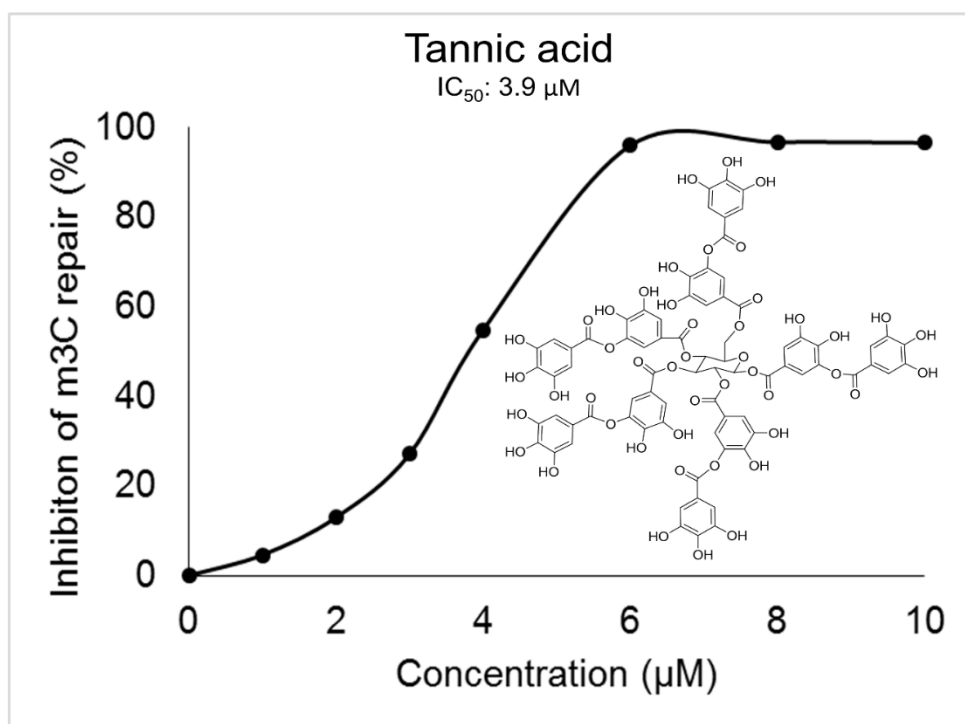

**Figure S7.** Data for determining the IC<sub>50</sub> value of compound **7** (tannic acid) on m3C.

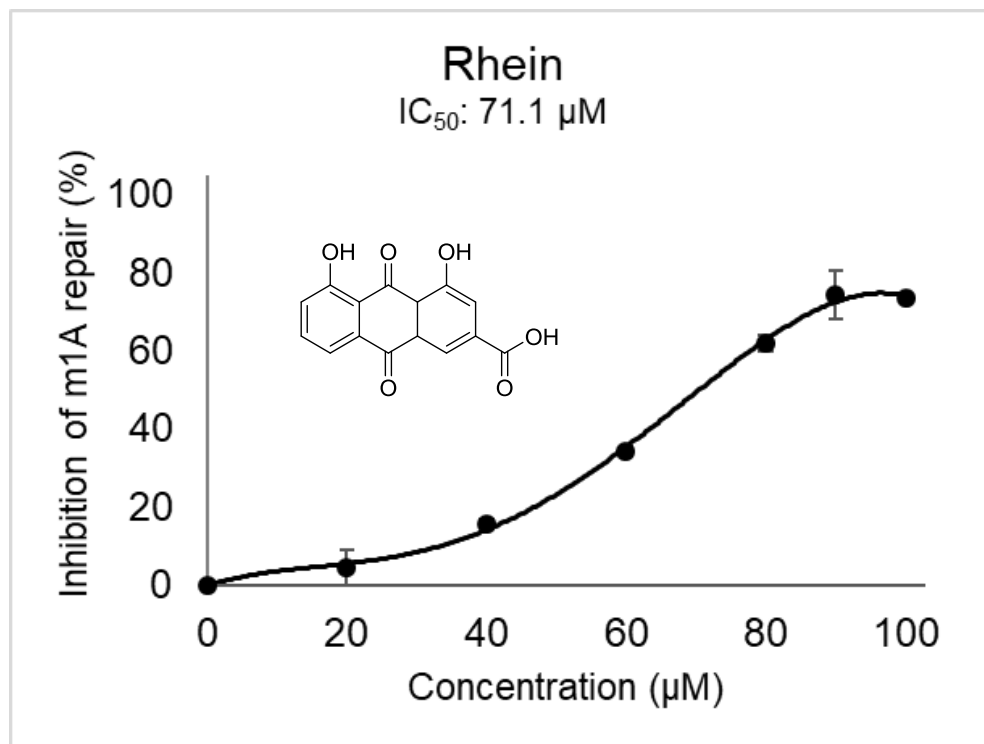

**Figure S8.** Data for determining the IC<sub>50</sub> value of compound **1** (rhein) on m1A.

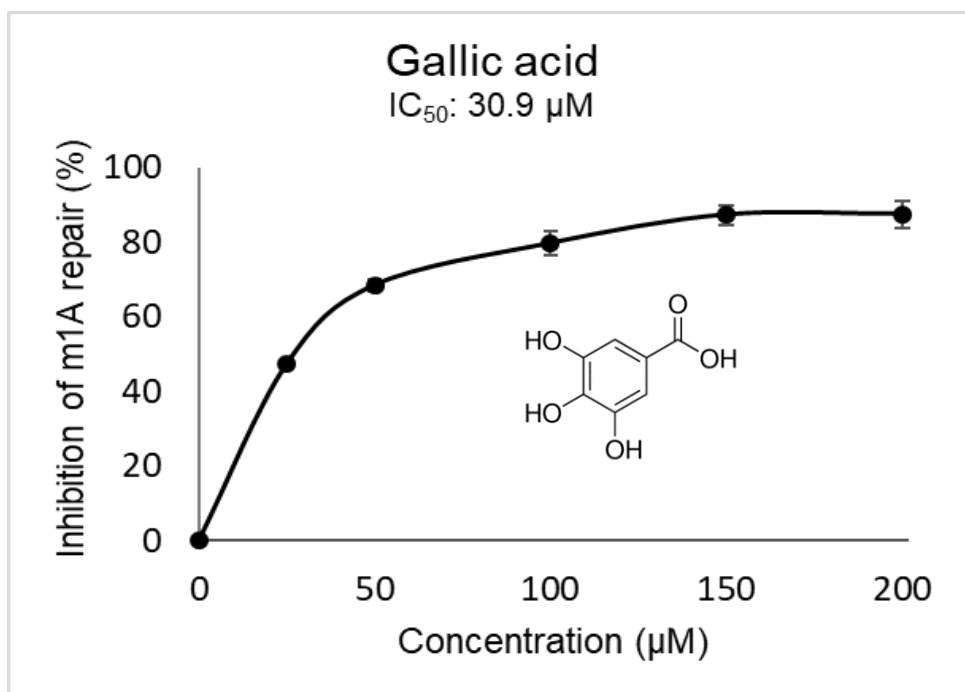

**Figure S9.** Data for determining the IC<sub>50</sub> value of compound **2** (gallic acid) on m1A.

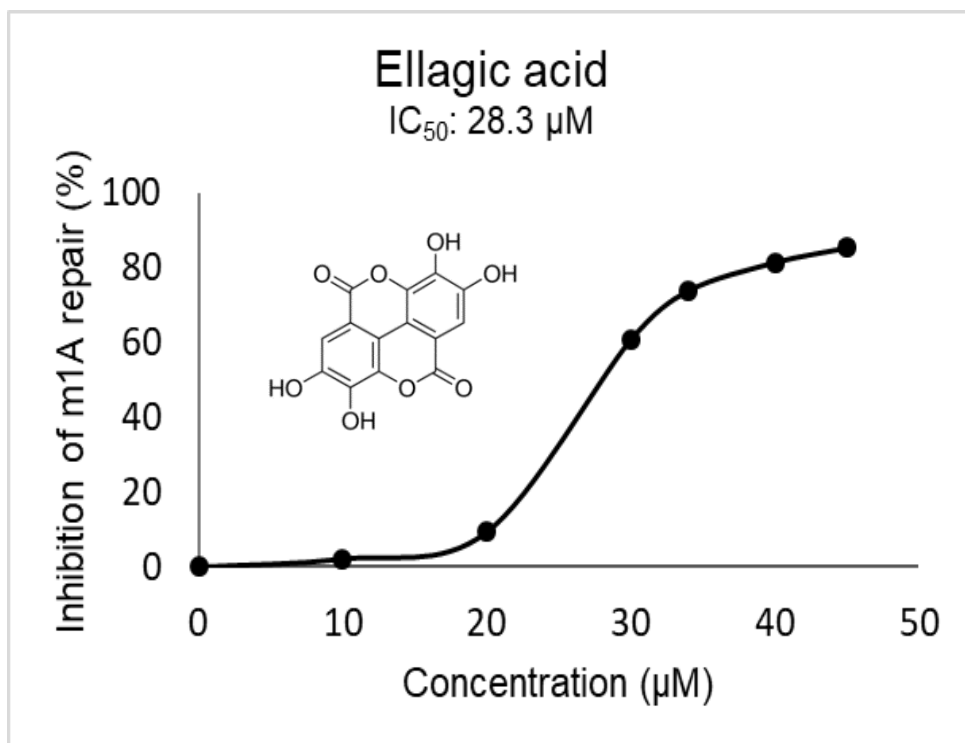

**Figure S10.** Data for determining the IC<sub>50</sub> value of compound **3** (ellagic acid) on m1A.

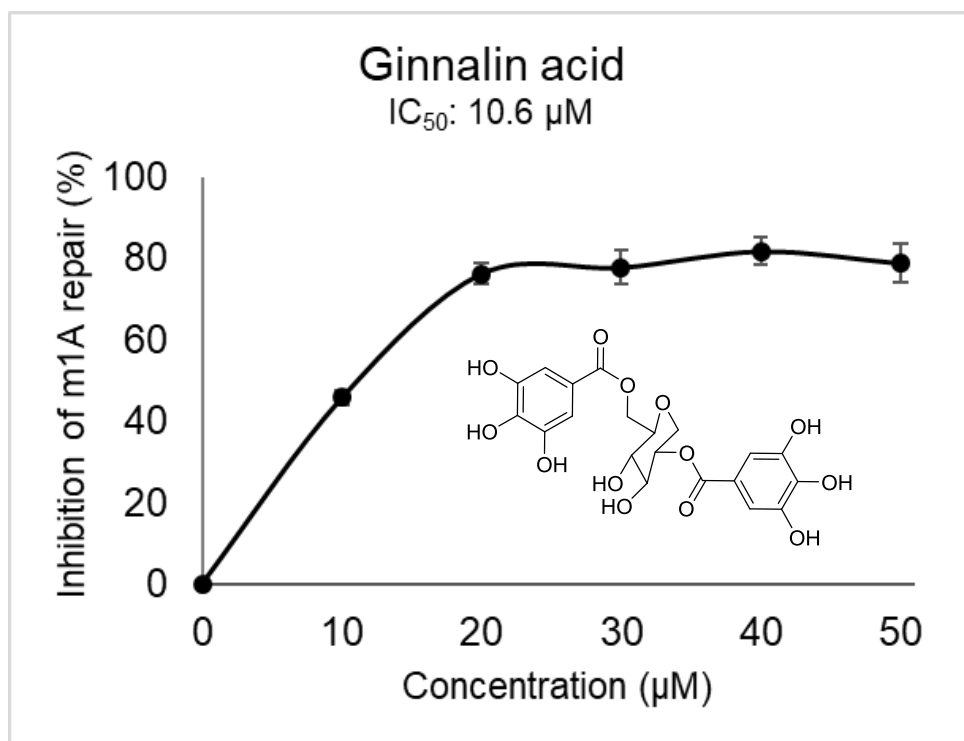

**Figure S11.** Data for determining the IC<sub>50</sub> value of compound **4** (ginnalin acid) on m1A.

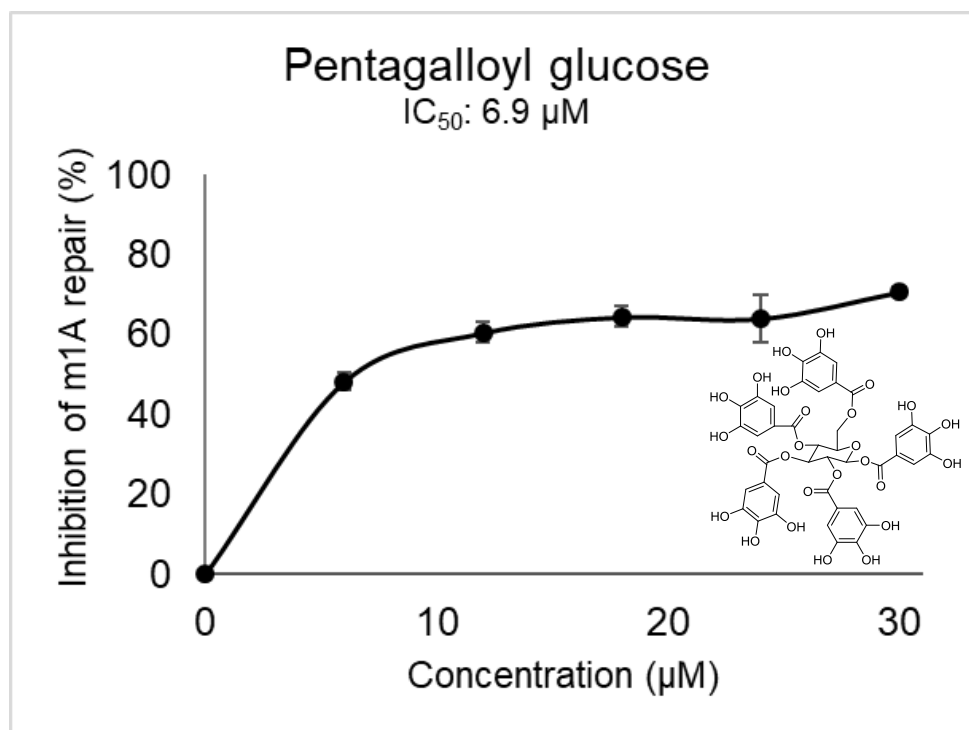

**Figure S12.** Data for determining the IC<sub>50</sub> value of compound **5** (pentagalloyl glucose) on m1A.

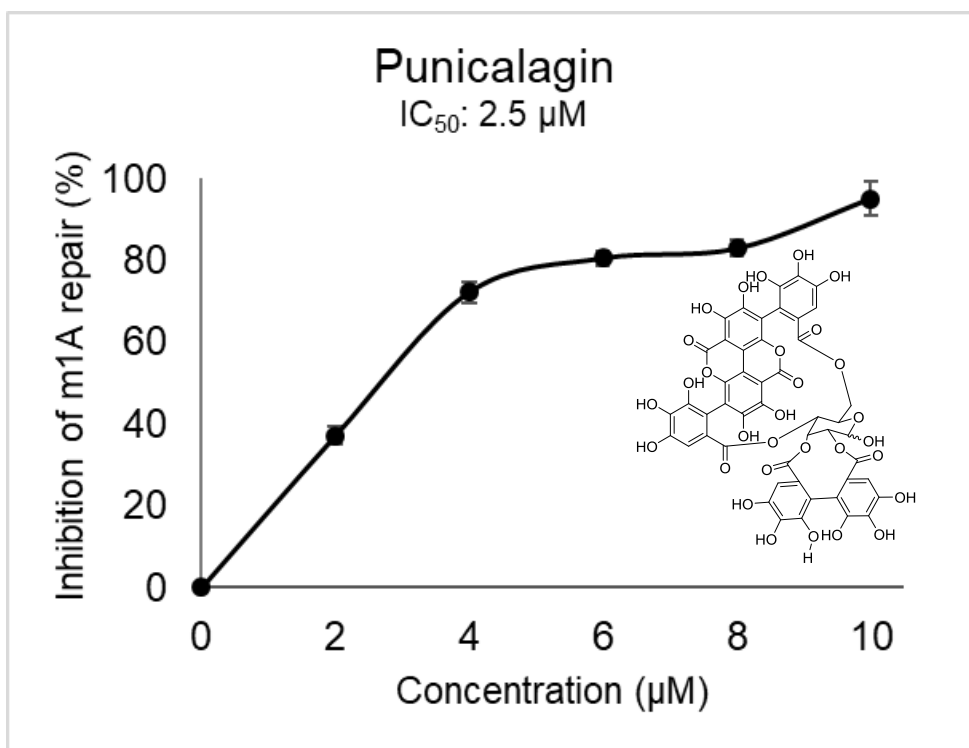

**Figure S13.** Data for determining the IC<sub>50</sub> value of compound **6** (punicalagin) on m1A.

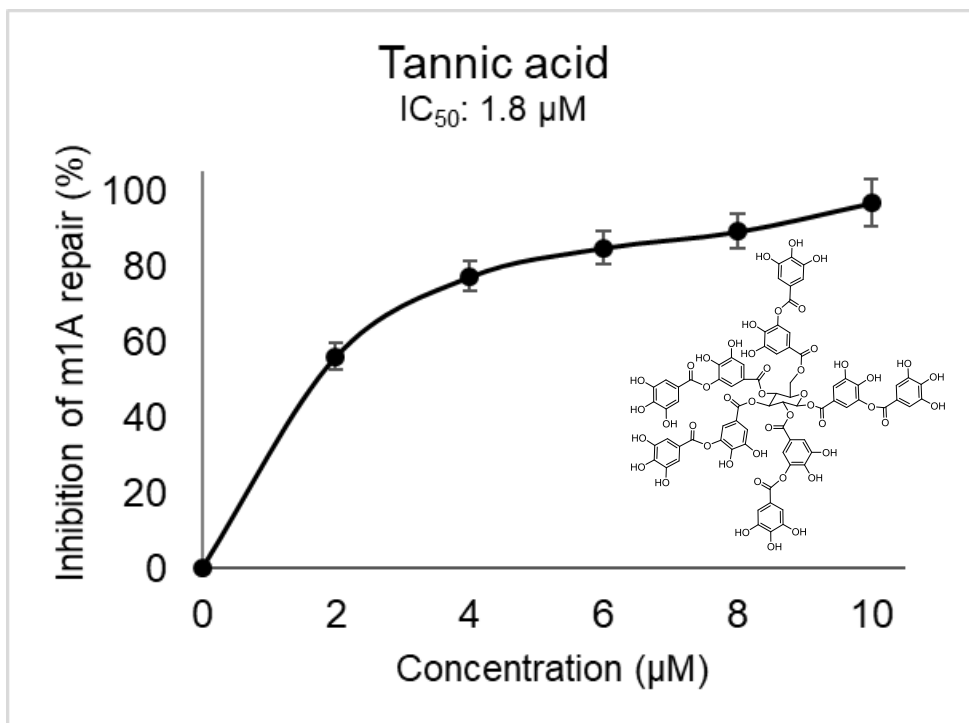

**Figure S14.** Data for determining the IC<sub>50</sub> value of compound **7** (tannic acid) on m1A.



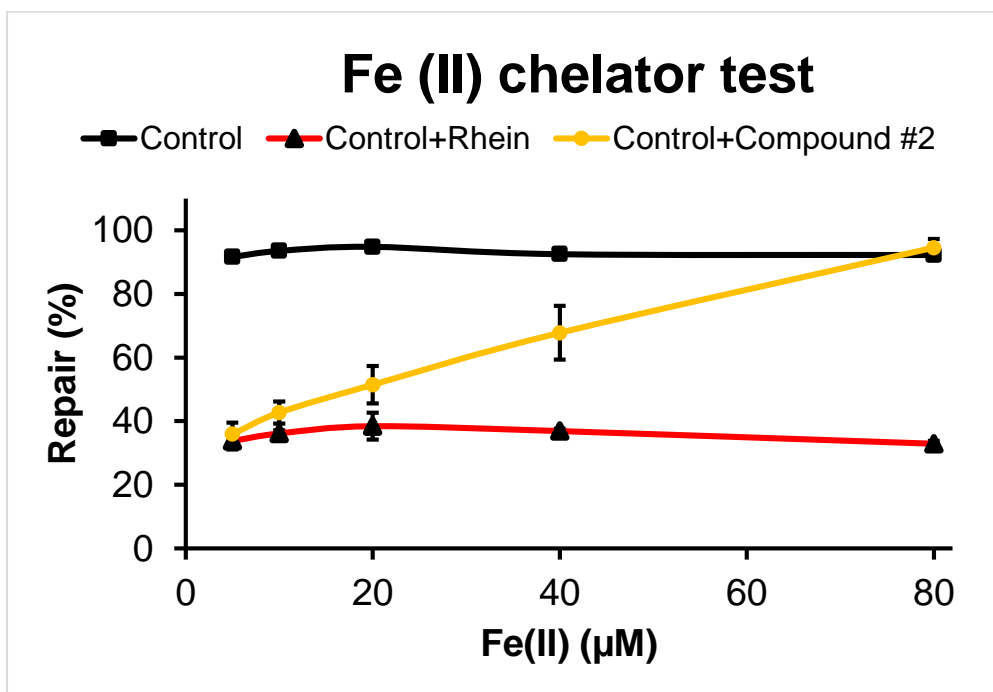

**Figure S15.** Fe (II) ion chelator test of compound 2 (gallic acid) at 50 µM.

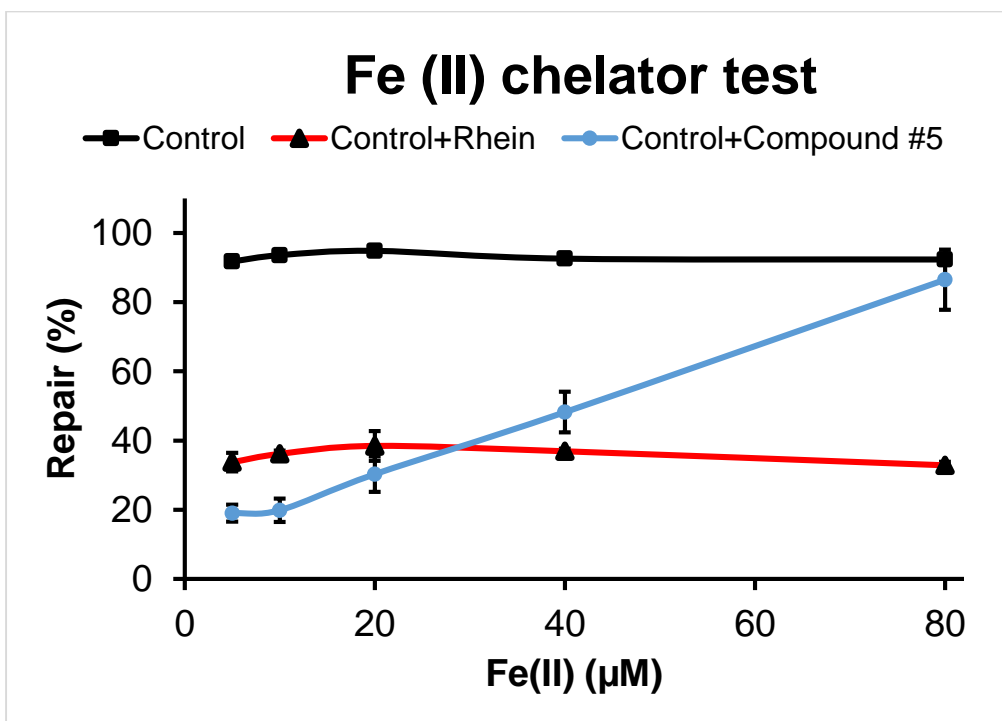

**Figure S16.** Fe (II) ion chelator test of compound 5 (pentagalloyl glucose) at 24 µM.
